# Supplementary material for: Tracking the Elusive Function of Bacillus subtilis Hfq
Source: PLOS journal article supplement (doi:10.1371/journal.pone.0124977), 2015-04-27
Supplement: S8 (10.1371/journal.pone.0124977.s008) [file journal.pone.0124977.s008]

## ***ahrC* expression in *hfq<sub>BS</sub>*-expressing strain and $\Delta hfq_{BS}$ mutant**

The BSB1 strain was used to express a C-terminally SPA tagged AhrC (AhrC<sup>SPA</sup>) by constructing a translational fusion of the *ahrC* coding sequence and the SPA tag sequence at the locus. In the resulting strain (Bas028) *ahrC-SPA* is expressed under the control of its own promoter. This fusion was transferred in *hfq* deleted strains (TR223 *hfq::cat* or TR232 *hfq::spec*), and the quantity of AhrC was measured by Western-blot in cells grown in LB rich medium.

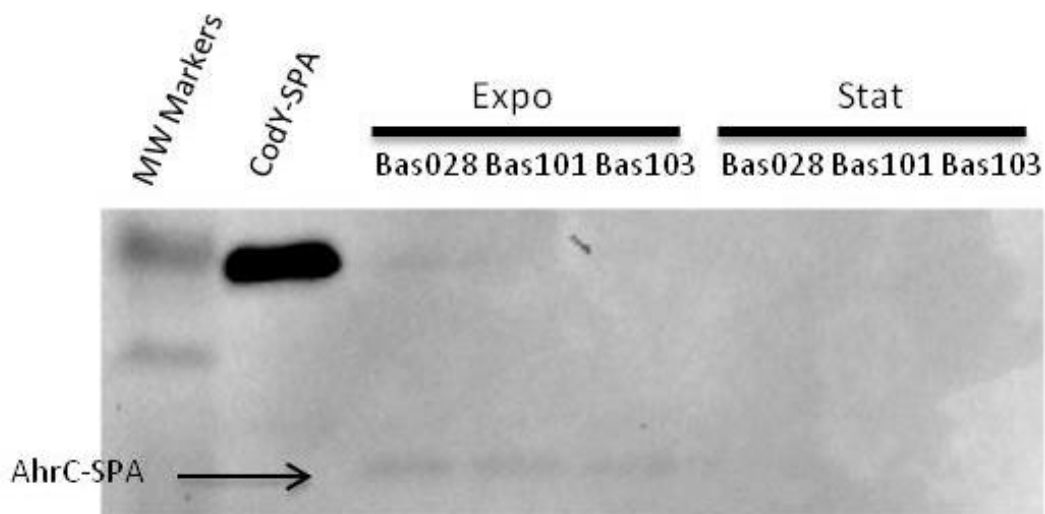

Protein samples extracted from cells carrying the *ahrC-SPA* translational fusion in *hfq<sub>BS</sub>*-expressing strain (Bas028) or  $\Delta hfq_{BS}$  mutants (Bas101, Bas103) were adjusted quantitatively and separated on a 10% SDS-PAGE. As control, a sample from cells expressing CodY<sup>SPA</sup> was also loaded on the gel. Faint bands of equal intensities corresponding to AhrC<sup>SPA</sup> were detected in the exponential phase as indicated by the arrow in the figure. No bands corresponding to AhrC<sup>SPA</sup> were visible for samples of the 3 strains taken in stationary phase of growth.
